# Supplementary material
Source: publisher figshare collection journal article supplement (https://diabetesjournals.figshare.com/articles/dataset/_/13369553)
Supplement: Supplementary file 1 [file 2]

# Durable effects of iGlarLixi up to 52 weeks in type 2 diabetes: The LixiLan-G extension study

week  
52

## Authors:

Lawrence Blonde, MD<sup>1</sup>, Julio Rosenstock, MD<sup>2</sup>, Juan Frias, MD<sup>3</sup>, Andreas L. Birkenfeld, MD<sup>4,5</sup>, Elisabeth Niemoeller, MD<sup>6</sup>, Elisabeth Souhami, MD<sup>7</sup>, Chen Ji, PhD<sup>8</sup>, Stefano Del Prato, MD<sup>9</sup>, Vanita R. Aroda, MD<sup>10,11</sup>

## Affiliations:

<sup>1</sup>Frank Riddick Diabetes Institute, Department of Endocrinology, Ochsner Medical Center, New Orleans, LA, USA; <sup>2</sup>Dallas Diabetes Research Center at Medical City, Dallas, TX, USA; <sup>3</sup>National Research Institute, Los Angeles, CA, USA; <sup>4</sup>Medical Clinic IV, Department of Diabetology, Endocrinology, Nephrology, University Clinic Tübingen, Tübingen, Germany; <sup>5</sup>German Center for Diabetes Research (DZD e.V.) and Institute for Diabetes Research and Metabolic Diseases of the Helmholtz Centre Munich at the University of Tübingen, Tübingen, Germany; <sup>6</sup>Sanofi, Frankfurt, Germany; <sup>7</sup>Sanofi, Paris, France; <sup>8</sup>Sanofi, Beijing, China; <sup>9</sup>University of Pisa, School of Medicine, Pisa, Italy; <sup>10</sup>MedStar Health Research Institute, Hyattsville, MD, USA; <sup>11</sup>Brigham and Women's Hospital, Boston, MA, USA

Introduction

Study design

Key results:  
Population

Key results:  
Efficacy

Key results:  
Safety

Conclusion

## Introduction

**iGlarLixi** is a once-daily titratable fixed-ratio combination (FRC) of basal insulin glargine 100 units/mL (iGlar) and the GLP-1 RA lixisenatide (Lixi)

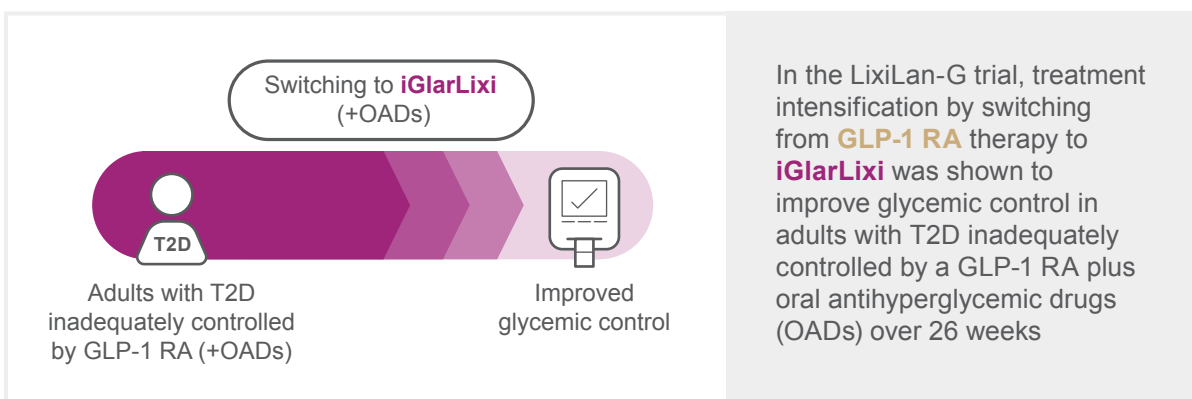

## Objective

This is a prespecified, 26-week, single-arm extension of LixiLan-G to determine the durability of **iGlarLixi** efficacy and safety over 52 weeks

## Study design

### LixiLan-G trial

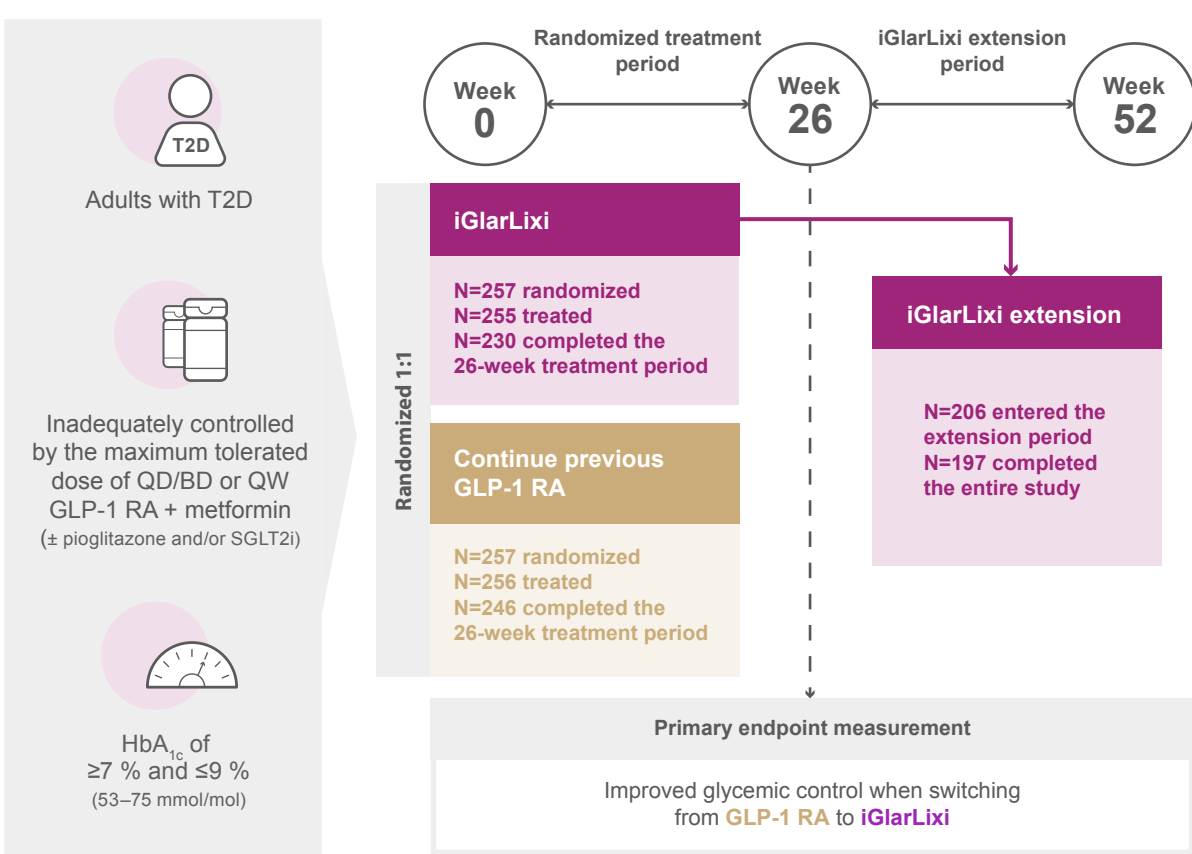

## Key results: Extension Population

### Mean $\pm$ SD baseline characteristics

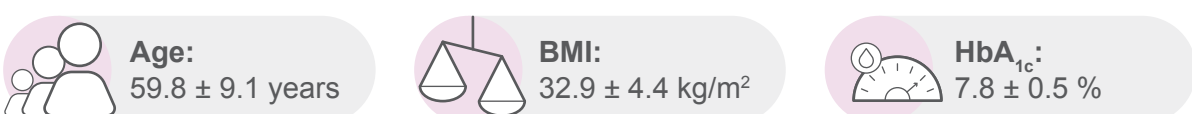

### GLP-1 RA use at screening

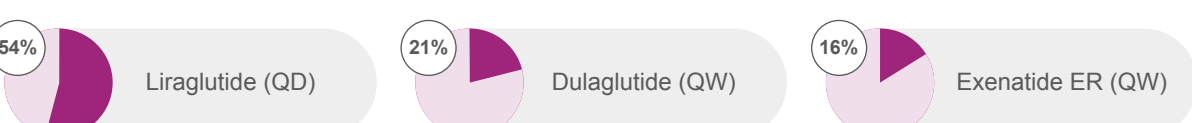

## Key results: Efficacy

### Glycemic control achieved with iGlarLixi at week 26 was maintained at week 52

|                                         | Baseline to week 26 |                | Baseline to week 52 |
|-----------------------------------------|---------------------|----------------|---------------------|
| Mean $\pm$ SD reduction in              | GLP-1 RA            | iGlarLixi      | iGlarLixi           |
| HbA <sub>1c</sub> (%)                   | -0.4 $\pm$ 0.8      | -1.0 $\pm$ 0.9 | -1.0 $\pm$ 0.9      |
| FPG (mmol/L)                            | -0.8 $\pm$ 2.5      | -2.1 $\pm$ 2.3 | -2.3 $\pm$ 2.4      |
| 2-hr PPG (mmol/L)                       | -1.2 $\pm$ 3.7      | -3.9 $\pm$ 3.8 | -4.3 $\pm$ 3.9      |
| 2-hr plasma glucose excursion* (mmol/L) | -0.5 $\pm$ 2.8      | -1.6 $\pm$ 3.2 | -1.9 $\pm$ 2.9      |

\*2-hr plasma glucose excursion is defined as change in plasma glucose concentration from before a meal to 2 hours after a meal

### Results at week 26 were also maintained at week 52 for target achievement endpoints:

|                                                                                     | At week 26 |           | At week 52 |
|-------------------------------------------------------------------------------------|------------|-----------|------------|
| Percentage at target                                                                | GLP-1 RA   | iGlarLixi | iGlarLixi  |
| HbA <sub>1c</sub> <7 %                                                              | 26%        | 62%       | 64%        |
| HbA <sub>1c</sub> <7 %<br>With no documented symptomatic (<3.0 mmol/L) hypoglycemia | 25%        | 57%       | 58%        |

## Key results: Safety

Safety results for **iGlarLixi** over 52 weeks were similar to those seen over 26 weeks

|                                                                     | Week 0–26 | Week 0–52 |
|---------------------------------------------------------------------|-----------|-----------|
|                                                                     | iGlarLixi | iGlarLixi |
| Any AE                                                              | 64%       | 73%       |
| Any GI disorder                                                     | 22%       | 25%       |
| Documented symptomatic ( $\leq 3.9$ mmol/L) hypoglycemia events PPY | 1.54      | 1.59      |
| Documented symptomatic ( $\leq 3.0$ mmol/L) hypoglycemia events PPY | 0.25      | 0.24      |

## Conclusion

The efficacy and safety of **iGlarLixi** at the end of the 26-week randomized treatment period were maintained at week 52.

In LixiLan G, **iGlarLixi** was an effective treatment for adults with T2D failing to achieve their glycemic target with **GLP-1 RA** and OADs

**Abbreviations**  
AE, adverse event; BD, twice daily; BMI, body mass index; ER, extended release; FPG, fasting plasma glucose; GI, gastrointestinal; GLP-1 RA, glucagon-like peptide-1 receptor agonist; HbA<sub>1c</sub>, glycated hemoglobin; iGlarLixi, a once-daily titratable fixed-ratio combination of insulin glargine 100 units/mL and the glucagon-like peptide-1 receptor agonist lixisenatide; PPG, post-prandial plasma glucose; PPY, per participant-year; QD, once daily; QW, once weekly; SD, standard deviation; SGLT2i, sodium-glucose cotransporter-2 inhibitor; T2D, type 2 diabetes

This infographic represents the opinions of the authors. For a full list of declarations, including funding and author disclosure statements, please see the full text online. [Full manuscript](#)
