# Supplementary material
Source: publisher figshare collection journal article supplement (https://diabetesjournals.figshare.com/articles/dataset/_/13369553)
Supplement: Supplementary file 2 [file 2]

## Supplementary Materials

**Table S1**—AEs\* and hypoglycemic events in the safety population.

|                                                          | Participants randomized to initial 26-week treatment period |            | Participants in the 26-week extension period (0–52 weeks) |
|----------------------------------------------------------|-------------------------------------------------------------|------------|-----------------------------------------------------------|
|                                                          | GLP-1 RA                                                    | iGlarLixi  | iGlarLixi                                                 |
|                                                          | (n = 256)                                                   | (n = 255)  | (n = 206)                                                 |
| Any AE                                                   | 121 (47.3)                                                  | 163 (63.9) | 150 (72.8)                                                |
| Participants with any serious AE                         | 9 (3.5)                                                     | 10 (3.9)   | 21 (10.2)                                                 |
| Participants with any AE leading to death                | 0                                                           | 0          | 1 (0.5)                                                   |
| Gastrointestinal disorders (overall)                     | 26 (10.2)                                                   | 55 (21.6)  | 51 (24.8)                                                 |
| Nausea                                                   | 6 (2.3)                                                     | 22 (8.6)   | 19 (9.2)                                                  |
| Diarrhea                                                 | 6 (2.3)                                                     | 14 (5.5)   | 15 (7.3)                                                  |
| Vomiting                                                 | 2 (0.8)                                                     | 8 (3.1)    | 8 (3.9)                                                   |
| Documented symptomatic ( $\leq 3.9$ mmol/L) hypoglycemia |                                                             |            |                                                           |
| Number of participants with events                       | 6 (2.3)                                                     | 71 (27.8)  | 74 (35.9)                                                 |
| Events per participant-year                              | 0.08                                                        | 1.54       | 1.59                                                      |
| Documented symptomatic ( $< 3.0$ mmol/L) hypoglycemia    |                                                             |            |                                                           |
| Number of participants with events                       | 1 (0.4)                                                     | 24 (9.4)   | 37 (18.0)                                                 |
| Events per participant-year                              | $< 0.01$                                                    | 0.25       | 0.24                                                      |

Data are n (%) unless otherwise stated. \*AEs listed are treatment-emergent AEs.

AE, adverse event; GLP-1 RA, glucagon-like peptide-1 receptor agonist; iGlarLixi, titratable fixed-ratio combination of basal insulin glargine 100 units/mL and the GLP-1 RA lixisenatide.

**Figure S1—Study design.**

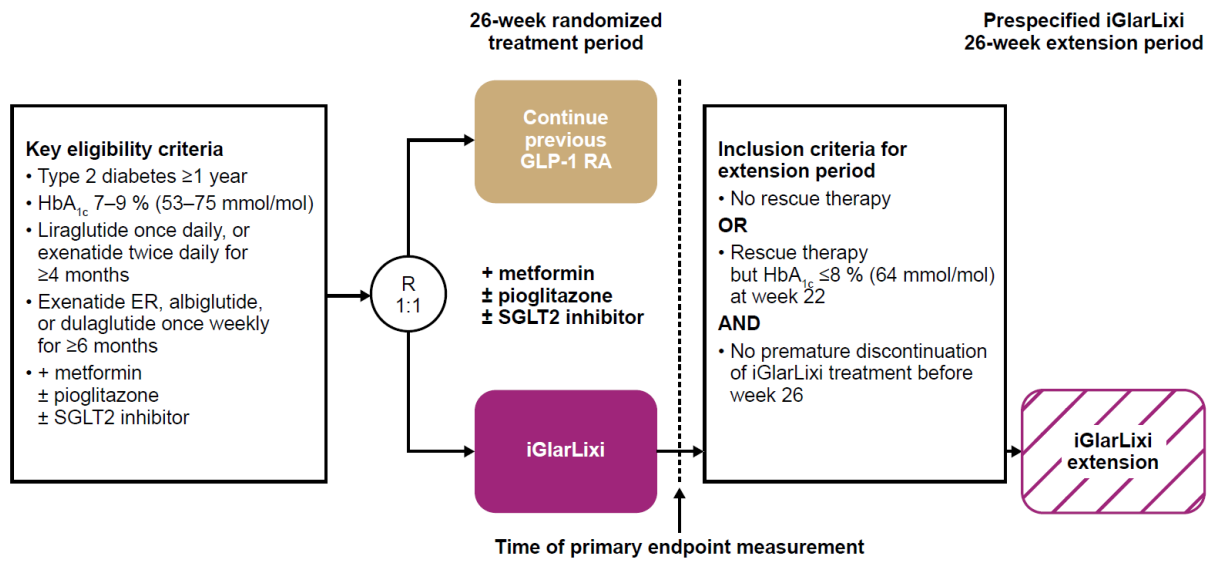

ER, extended release; GLP-1 RA, glucagon-like peptide-1 receptor agonist; HbA<sub>1c</sub>, glycated hemoglobin; iGlarLixi, titratable fixed-ratio combination of basal insulin glargine 100 units/mL and the GLP-1 RA lixisenatide; R, randomization; SGLT2, sodium glucose cotransporter 2.

**Figure S2—Patient disposition.**

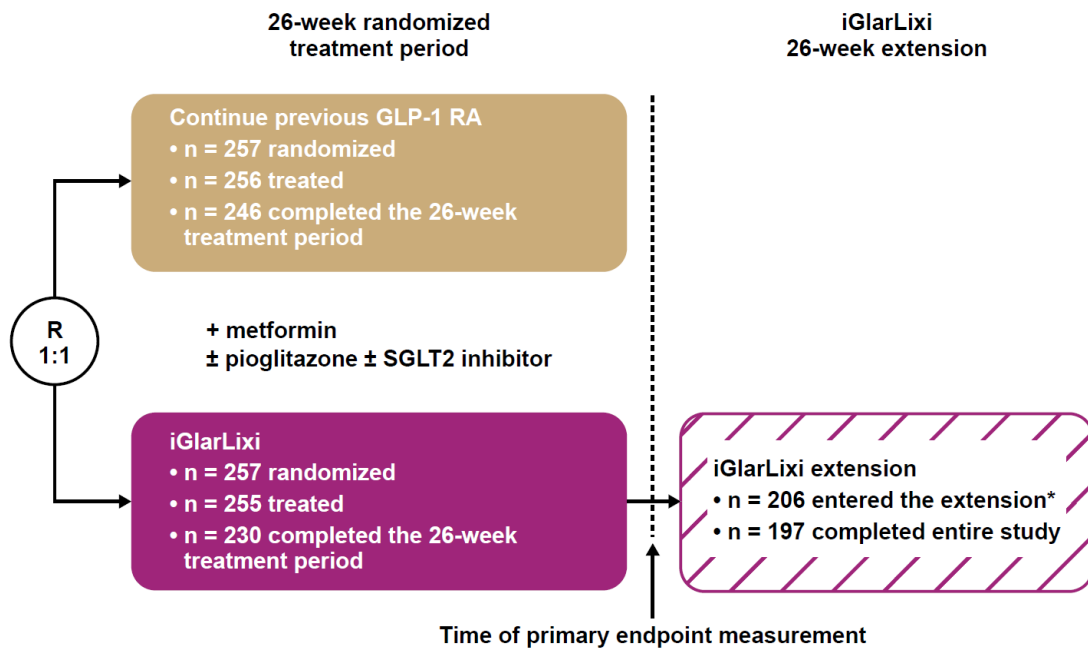

\*Five participants who entered the extension phase had received rescue therapy during the main treatment period but had an  $HbA_{1c} \leq 8\%$  (64 mmol/mol) at week 22. The rescue therapies received were insulin glulisine (n=2), insulin lispro (n=1), glimepiride (n=1), and glipizide (n=1).

GLP-1 RA, glucagon-like peptide-1 receptor agonist; iGlarLixi, titratable fixed-ratio combination of basal insulin glargine 100 units/mL and the GLP-1 RA lixisenatide; R, randomization; SGLT2, sodium glucose co-transporter 2.
